# Supplementary material for: Soil warming alters nitrogen cycling in a New England forest: implications for ecosystem function and structure
Source: Springer Nature journal article supplement (doi:10.1007/s00442-011-2133-7), 2011-10-04
Supplement: MOESM1 [file 442_2011_2133_MOESM1_ESM.doc]

Soil warming alters nitrogen cycling in a New England forest: implications for ecosystem function and structure

S.M. Butler1, J.M. Melillo1, J.E. Johnson1, 2, J. Mohan1, 3, P.A. Steudler1, H. Lux1, 4, E. Burrows1, 5, R.M. Smith1, 6, C.L. Vario1, 7, L. Scott1, T.D. Hill1, 8, N. Aponte1, 9 and F. Bowles10

1The Ecosystem Center, Marine Biological Laboratory, Woods Hole, MA, 2Biology Department, Stanford University, Palo Alto, CA, 3School of Ecology, University of Georgia, Athens, GA, 4Harvard Forest, Petersham, MA, Department of Chemistry and Chemical Biology, 5Rutgers University, Piscataway, NJ, 6Geology Department, University of Maryland, College Park, MD, 7Department of Biological Sciences, Dartmouth College, Hanover, NH, 8Yale School of Forestry and Environmental Studies, New Haven, CT, 9University of Puerto Rico at Mayagüez, 10Research Designs, Lyme, NH

**Electronic Supplementary Material 1**

**Figure S1.** Concentration of (a) ammonium and (b) nitrate in lysimeter samples collected at 50cm depth, in response to soil warming. Each circle represents the mean of n=7 lysimeter samples + 1 SE. Sample months varied by year.

**Figure S2.** Concentration of nitrous oxide measured in response to soil warming. Each bar represents the mean of n=6 gas samples + 1 SE.
